# Supplementary material
Source: PubMed Central journal article supplement (PMC3207663)
Supplement: 1106232108_pnas.201106232SI.pdf [file 1106232108_pnas.201106232SI.pdf]

# Supporting Information

Zhou et al. 10.1073/pnas.1106232108

## SI Materials and Methods

**Quantitative Real-Time PCR Analysis.** Total cellular RNA was prepared using TRIzol (Invitrogen), and reverse transcription was performed with SuperScript First-strand kit (Invitrogen). PCR was run on a 7300 real-time PCR System (Applied Biosystems), using the SYBR Green Master Mix (Applied Biosystems), and each mRNA signal was normalized to cyclophilin (*Cph*) as a house-keeping gene. Values are presented as means  $\pm$  SD of three independent samples. Primer sequences were used as follows: *Cph*, forward 5'-ATGGTCAACCCACCGTGT and reverse 5'-TTCTTGCTGTCTTGAACCTTTGTC; CCAAT/enhancer-binding protein  $\beta$  (*Cebpb*), forward 5'-ACGGTGGACAAGCTGAGCG and reverse 5'-CCTTGCTGCTGCGTCTCCAGG; arginase, liver (*Arg1*), forward 5'-CTCCAAGCCAAAGTCCTTAGAG and reverse 5'-AGGAGCTGTCATTAGGGACATC; NF- $\kappa$ B polypeptide gene enhancer in B-cells inhibitor  $\alpha$  (*Nfkb1a*), forward 5'-CTCACGGAGGACGGAGACTC and reverse 5'-CTCTTCGTGGATGATTGCCA; colony-stimulating factor 3 (*Csf3*), forward 5'-ATGGCTCAACTTTCTGCCAG and reverse 5'-CTGACAGTGACCAAGGGGAAC; S100 calcium-binding protein A8 (*S100a8*), forward 5'-AAATCACCATGCCCTCTACAAG and reverse 5'-CCCACCTTTTATCACCATCGCAA; *Tnfa*, forward 5'-GAGGCCAAGCCCTGGTATG and reverse 5'-CGGGCCGATTGATCTCAGC; *Il6* forward 5'-CTGATGCTGGTGACAAACACA and reverse 5'-AGCCTCCGACTTGTGAAGTG; *Nos2*, forward 5'-CCCTCCTGATCTTGTGTTGGA and reverse 5'-CAACCCGAGCTCCTGGAAC; CCAAT/enhancer-binding protein  $\delta$  (*Cebpd*), forward 5'-CGACTTCAGCGCCTACATTGA and reverse 5'-CTAGCGACAGACCCACAC; myeloperoxidase (*Mpo*), forward 5'-AGTTGTGCTGAGCTGTATGGA and reverse 5'-CGGCTGCTTGAAGTAAACAGG; elastase (*Ela2*), forward 5'-TGCCAGGAATTCGTCTATGT and reverse 5'-GTGGCGTTAATGGTAGCGGA.

**Microarray Analysis.** Total cellular RNA was prepared using TRIzol (Invitrogen) and purified using the RNeasy Mini kit (QIAGEN). Samples were processed with the one-cycle cDNA Synthesis kit (Affymetrix) and subjected to Affymetrix expression analysis according to the manufacturer's instructions. Two independent sets of experiments were performed to increase the sample size. In the first set we included cDNA samples of two WT and two TNF- $\alpha$ -induced protein 3 (*TNFAIP3*)-interacting protein 1 double-knockout (*Tnfp1*<sup>-/-</sup>) mice, which were analyzed with the Mouse Genome 430 2.0 array (Affymetrix). In the second set we included samples of three WT and three *Tnfp1*<sup>-/-</sup> mice, which were analyzed with the HT 430 PM Array (Affymetrix). The two data sets were summarized using the RMA algorithm, joined, and batch corrected to remove chip effects. Next, a two-way ANOVA model tested the expression of each probe set, and a step-up false-discovery method was applied to assign statistical significance to the probe sets using Partek Genomics Suite 6.4. The two factors were genotype and stimulation. Fold changes were calculated also in STATA/SE 11.1 (StataCorp).

**Immunohistochemistry.** *Tnfp1*<sup>-/-</sup> mice and littermate controls (5- to 8-wk-old) were perfused with 4% (vol/vol) PBS-buffered formaldehyde and embedded in paraffin. Organs were cut in 5- $\mu$ m sections, deparaffinized, and stained with the F4/80 antibody (Caltag), followed by detection with secondary biotinylated antibodies and HRP-labeled streptavidin (Thermo Shandon).

Slides were incubated with 3,3'-diaminobenzidine tetrahydrochloride for 5 min and counterstained with hematoxylin.

**Sample Preparation for MS Analysis.** The gel lanes containing the immunopurified samples (Fig. 1A) were excised into 100 bands, each of which was cut into small plugs, washed with 50% (vol/vol) acetonitrile, and destained by repeated incubations in 100 mM ammonium bicarbonate (pH 8.0) containing 50% acetonitrile. Gel plugs were reduced (10 mM DTT, 1 h at 37 °C), alkylated (50 mM iodoacetamide, 45 min at room temperature in the dark), washed twice with 50% acetonitrile in 50 mM ammonium bicarbonate, dried in a SpeedVac (Savant), and rehydrated for 10 min in 10  $\mu$ L of 0.2  $\mu$ g/ $\mu$ L trypsin. Then 25  $\mu$ L of ammonium bicarbonate (25 mM, pH 8.0) was added and incubated for ~12 h at 37 °C, followed by peptide extraction using 20–30  $\mu$ L of 0.2% formic acid. The peptide-containing solution then was transferred to a sample vial for liquid chromatography-tandem MS (LC-MS/MS) analysis.

**Electrospray Ionization Ion Trap MS Analysis.** LC-MS/MS analysis was performed using a ThermoFisher LTQ XL linear ion trap mass spectrometer in line with a nanoAcquity ultra-performance LC system (Waters Corporation). Tryptic peptides were loaded onto a "precolumn" (Symmetry C18, 180- $\mu$ m i.d.  $\times$  20 mm, 5- $\mu$ m particle) (Waters Corporation) which was connected through a zero dead-volume union to the analytical column (BEH C18, 75- $\mu$ m i.d.  $\times$  100 mm, 1.7- $\mu$ m particle) (Waters Corporation). The peptides were eluted over a gradient (0–70% B in 60 min, 70–100% B in 10 min, where B = 70% (vol/vol) acetonitrile, 0.2% formic acid) at a flow rate of 250 nL/min and were introduced online into the linear ion trap mass spectrometer (ThermoFisher) using electrospray ionization. Data-dependent scanning was incorporated to select the 10 most abundant ions (one microscan per spectrum; precursor isolation width 3.0 Da; 35% collision energy; 30-ms ion activation; exclusion duration, 30 s; repeat duration, 15 s; repeat count, 2) from a full-scan mass spectrum for fragmentation by collision-activated dissociation.

**Database Search.** Product ions (b/y-type ions) were queried in an automated database search against a UniProt database [Sprot 53.0 (269293 sequences; 98902758 residues), *Mus musculus* subset] by the Mascot search algorithm (1). The following residue modifications were allowed in the search: carbamidomethylation on cysteine (fixed modification) and oxidation on methionine (variable modification). Mascot was searched with a precursor ion tolerance of 1.5 Da and a fragment ion tolerance of 0.6 Da and using the automatic decoy database-searching tool in Mascot. The identifications from the automated search were verified by manual inspection of the raw data.

**ChIP.** Control or CpG-DNA-treated bone marrow-derived macrophages (BMM) were fixed by adding formaldehyde to the cell culture medium (final concentration 1%, vol/vol) for 10 min at room temperature, washed with ice-cold PBS, lysed with buffer containing 50 mM Tris HCl (pH 8.0), 10 mM EDTA, 1% (wt/vol) SDS, and a protease inhibitor mixture (Roche), followed by sonication in an ice-water bath for 5  $\times$  10 s at 15- $\mu$ m amplitude (Sanyo 150 sonicator) and centrifugation at 20,000  $\times$  g for 10 min. The obtained supernatants were diluted 10 times with dilution buffer [20 mM Tris HCl (pH 8.0), 150 mM NaCl, 1 mM EDTA, 1% (wt/vol) Triton X-100, 0.01% SDS, protease inhibitor mixture (Roche)] and incubated with antibodies against cREL (C), DNA-dependent RNA polymerase II (Pol II, CTD4H8), C/EBP $\beta$  (H-7),

NaHCO<sub>3</sub> and 1% SDS, and crosslinking was reversed by treatment with 20 μL of 5-M NaCl and incubation at 65 °C for 4 h. DNA was extracted with phenol/chloroform and quantified by quantitative PCR (qPCR). The sequences of the promoter-specific primers were *Nfkbia* (−191 to −86), 5′-GGGCCTGGTCGGGAGGACTT and 5′-GGGCCGGGGTTTCATCGGAGA; *Nos2* (−338 to −232), 5′-CAGCAGCTGCAAGCCAGGGT and 5′-AAGGCAGTGGCCCCTAGGCA; *S100a8* (−51 to 91), 5′-GGCAGCTGGCC-AAGCTTTCC and 5′-TCCCCCAACCCTCGCTAAGGA; *Csf3* (−22 to 102), 5′-TCCCGGGGCGCTTGATGGCTT and 5′-AGC-TTCATGCGCCTCTGGGC.

1. Perkins DN, Pappin DJ, Creasy DM, Cottrell JS (1999) Probability-based protein identification by searching sequence databases using mass spectrometry data. *Electrophoresis* 20:3551–3567.

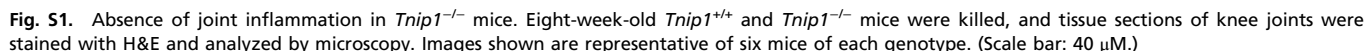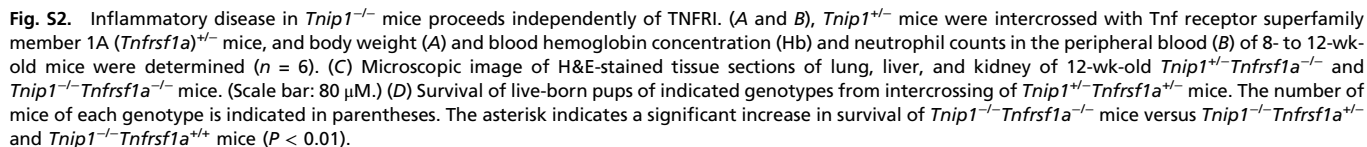



**Table S1. Peptides identified and manually verified from LC-MS/MS analysis in the constitutive and activated MyD88-dependent protein complexes described in Fig. 1A**

|              | Control                                                                                                                                                                                                                                                                                                                                                                                      | Coumermycin                                                                                                                                                                                                                                                                                                   |       | Control      | Coumermycin                                                                                                                     |
|--------------|----------------------------------------------------------------------------------------------------------------------------------------------------------------------------------------------------------------------------------------------------------------------------------------------------------------------------------------------------------------------------------------------|---------------------------------------------------------------------------------------------------------------------------------------------------------------------------------------------------------------------------------------------------------------------------------------------------------------|-------|--------------|---------------------------------------------------------------------------------------------------------------------------------|
| MyD88 (bait) | RLSLFLNPR<br>VGSGSLDSFMFSIPLVALNVGVR<br>LSLFLNPR<br>TPVAADWTLLAEEMGFLEYLR<br>ELETRPDPT<br>SLLDAWQGR<br>SGASVGR<br>LLELLALLDR<br>LLELLALLDREDILK<br>LLELLALLDREDILKELK<br>IEEDCQK<br>QLEQTDYR<br>LKLCVSDR<br>LCVSDRDVLPGTCVWSIASIEK<br>DVLPGTCVWSIASIEK<br>RMVVVVSDDYLSK<br>MVVVVSDDYLSK<br>ECDFTKFALSLSPGVQK<br>FALSLSPGVQK<br>FALSLSPGVQKR<br>KDFPSILR<br>DFPSILR<br>FITICDYNPCTK<br>SWFWTR | RLSLFLNPR<br>LSLFLNPR<br>ELETRPDPT<br>SLLDAWQGR<br>LLELLALLDR<br>LLELLALLDREDILK<br>QQNQSEKPLQVAR<br>QLEQTDYR<br>LKLCVSDR<br>DVLPGTCVWSIASIEK<br>RMVVVVSDDYLSK<br>MVVVVSDDYLSK<br>FALSLSPGVQK<br>KDFPSILR<br>DFPSILR<br>FITICDYNPCTK<br>SWFWTR<br>RLPIK<br>LAKALSLP                                           | TRAF6 | Not detected | EILSLTVK<br>REILSLTVK<br>LHLQLPTAQR<br>LTILDQSEALIR<br>KEGFQPRSTDAGV<br>YECPICLMALR<br>METQSMYVGELK                             |
| IRAK1        | not detected                                                                                                                                                                                                                                                                                                                                                                                 | IGEGGFVCVYR<br>QSFLTEVEQLSR<br>LDILLGTAR<br>SSNVLLDER<br>LGDFGLAR<br>GTLAYLPEEYIK<br>DLIEDEAEEAGVTLK<br>APAQAAQQLR<br>AIQFLHQDPSLIHGDIK<br>VQGVISITR<br>SLLDTGPIMAGAQ<br>ISEGTFADYQGR<br>NGVAFQK<br>FLQAEMQLCLR<br>SANVLLDQHLNPK<br>DLLLSEIPNSTSSVCSR<br>VSLAGVEEQLR<br>KTSMGKAVVK<br>DLLLSEIPNSTSSVCSRKTSMGK | TRAF3 | Not detected | VSLQNESVEKNK<br>VTELESVDK<br>NTGLLESQSLR                                                                                        |
| IRAK2        | Not detected                                                                                                                                                                                                                                                                                                                                                                                 | NLNVGILR<br>RFEALLQTGK<br>FEALLQTGK<br>SITNNFDEQPASAGNR<br>MGEFGFVVYK<br>GCVNNTIVAVK<br>LGAMVEISTEELK<br>SANILLDKDFTAK<br>ISDFGLAR<br>IVGTTAYMAPEALR<br>TIEDYTDEK                                                                                                                                             | ABIN1 | Not detected | MALEFNR<br>IFEEFQR<br>VPEAGAFGAAEK<br>MNEEKEELKK<br>YLQDQLSPLTR<br>QENEALKAKLDK<br>LQAQVTLTNAQLK<br>KQELVTQNELK<br>TSILQTLCEQLR |
| IRAK4        | RFEALLQTGK<br>ISDFGLAR<br>DRTSVMPMPK<br>GCVNNTIVAVKK                                                                                                                                                                                                                                                                                                                                         | NLNVGILR<br>RFEALLQTGK<br>FEALLQTGK<br>SITNNFDEQPASAGNR<br>MGEFGFVVYK<br>GCVNNTIVAVK<br>LGAMVEISTEELK<br>SANILLDKDFTAK<br>ISDFGLAR<br>IVGTTAYMAPEALR<br>TIEDYTDEK                                                                                                                                             |       |              |                                                                                                                                 |

IRAK: IL-1 receptor-associated kinase; TRAF: TNF receptor-associated factor.
